# Supplementary material
Source: PubMed Central journal article supplement (PMC3910572)
Supplement: 1316911111_pnas.201316911SI.pdf [file 1316911111_pnas.201316911SI.pdf]

# Supporting Information

Raznahan et al. 10.1073/pnas.1316911111

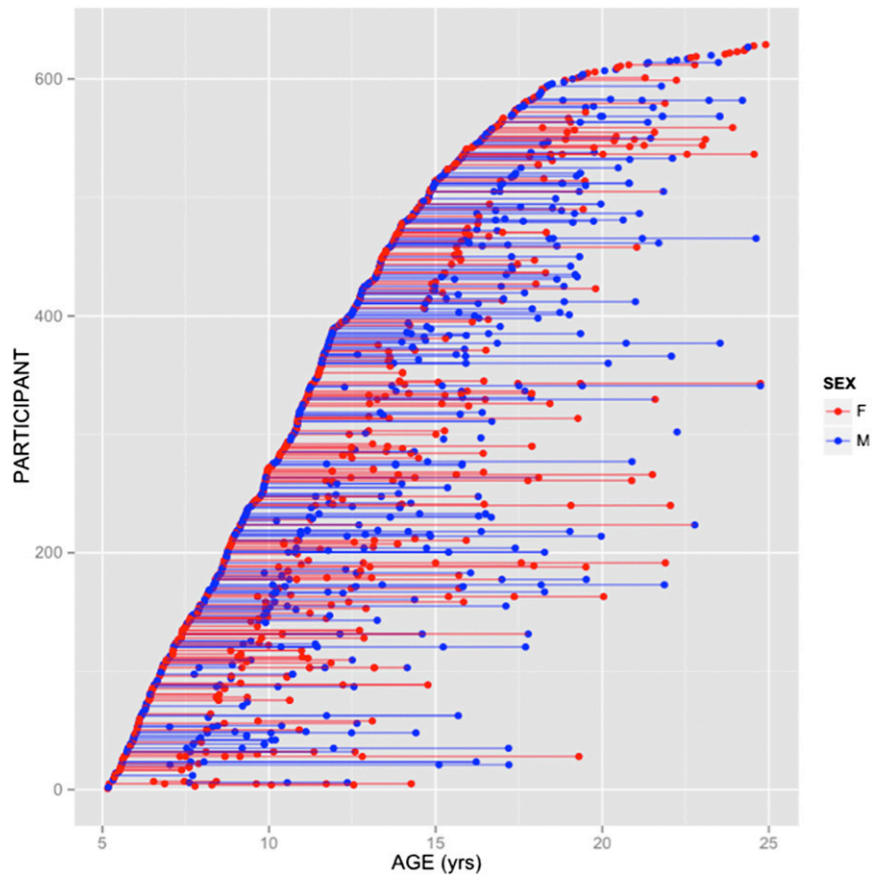

Fig. S1. Distribution of scans per person by sex across the study age span. Each point denotes a scan; horizontal lines connect scans from the same individual. Red, female; blue, male.





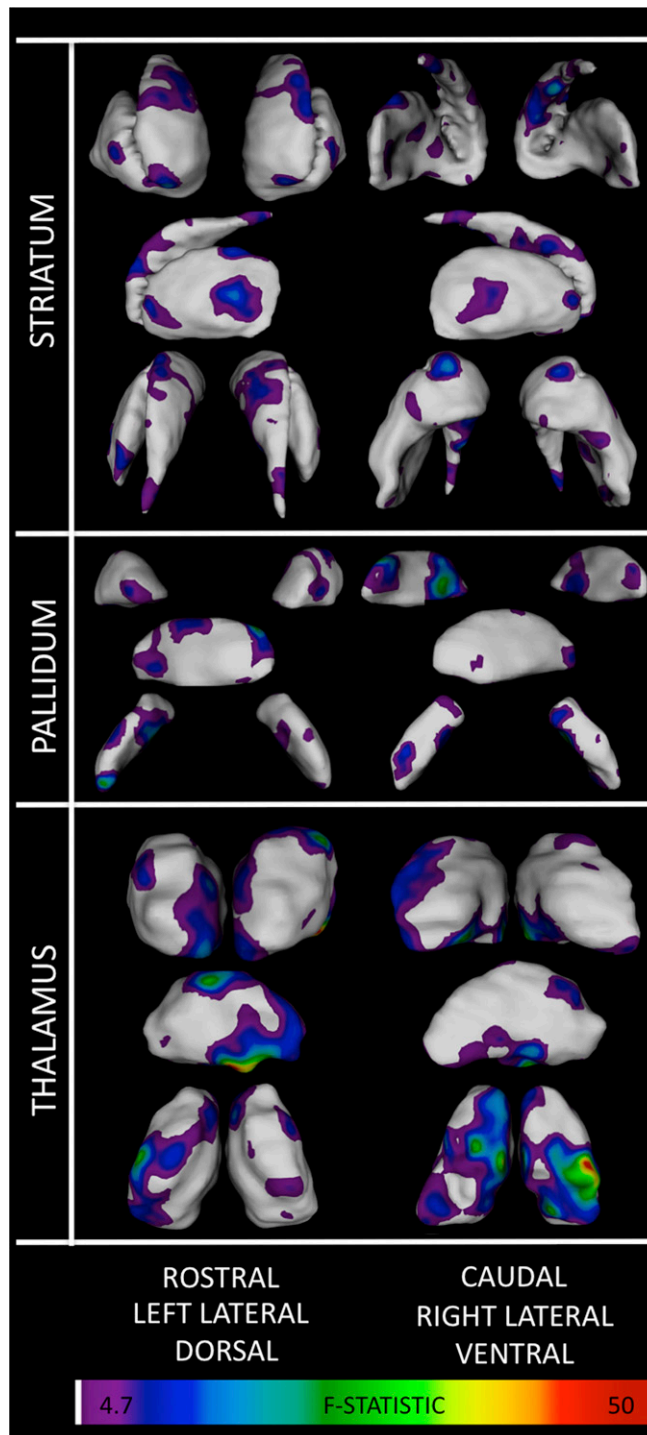

**Fig. 55.** Maps of significant quadratic age effects. Colored regions denote significant quadratic effects of age on local surface area after FDR correction for multiple comparisons. Linear age effects were preferred in the analysis of local age and age\*sex effects as (i) they showed a significant relation with local surface area over a greater proportion of the subcortex than quadratic effects and (ii) confidence intervals for age-at-attainment of peak surface area within foci of prominent quadratic effect consistently extended beyond the age range of our sample.



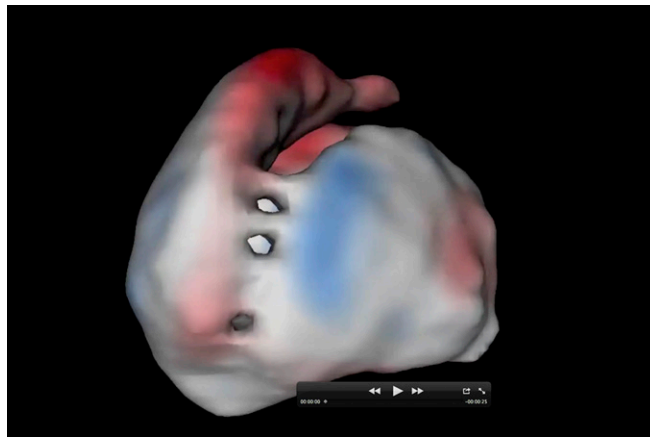

**Movie S1.** Regional differences in subcortical maturation. The left striatum, pallidum, and thalamus are assembled in anatomical space and shown rotating in the axial plane, from a left anterior oblique perspective. As in Fig. 2A, these are unthresholded maps where color encodes regional differences in the direction (blue, contraction; red, expansion) and rate (greater saturation, faster change) of linear surface-area change with increasing age.

[Movie S1](#)

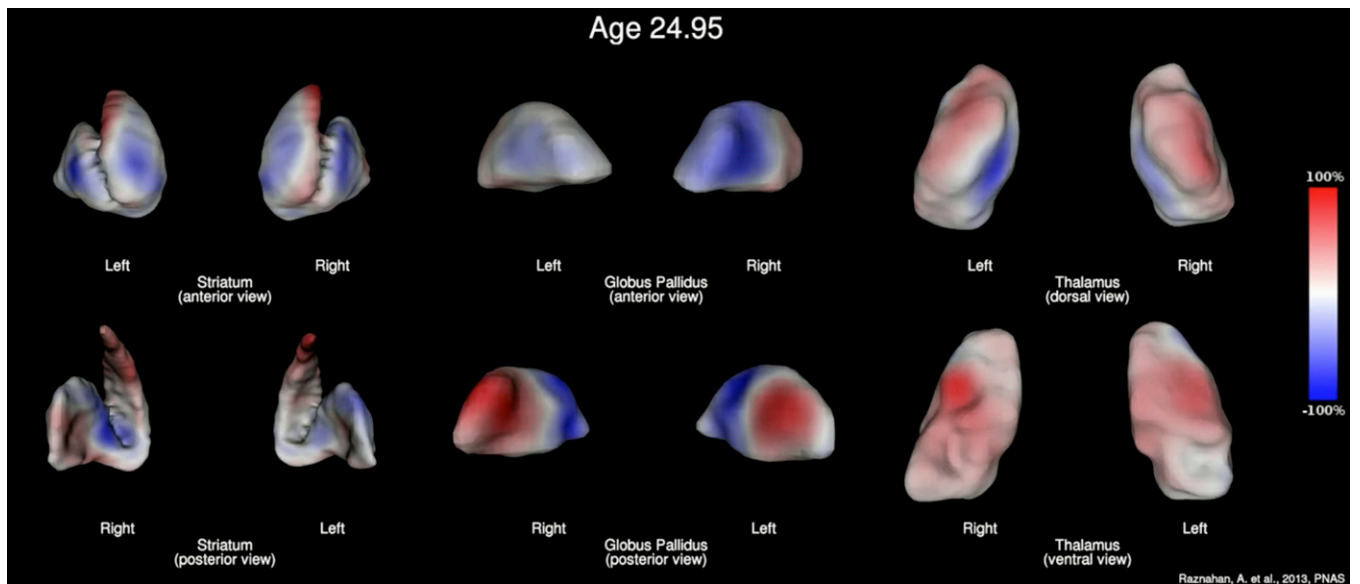

**Movie S2.** Maps of evolving local expansion and contraction with age for the striatum, pallidum, and thalamus. These movies show areal differences (blue, contraction; red, expansion) relative to a 5-y-old baseline (white), across striatal, pallidal, and thalamic surfaces. Areal differences are expressed as a percentage of the peak absolute surface area change value observed within each structure.

[Movie S2](#)
